# Supplementary material for: Identification and Localization of Telocyte-Like Cells in Human Umbilical Cord Stroma
Source: Research Square preprint supplement (doi:10.21203/rs.3.rs-7203915/v1), 2025-08-22
Supplement: Supplementary file 1 [file 4d7f6ce1f1c3cedc84623ba8.docx]

**Supplementary Table** **1**: Reagents and protocols used in immunofluorescent labeling.

| Antibodies | | Source | Brand | Catalog number | Dilution |
| --- | --- | --- | --- | --- | --- |
| **Primary Antibodies** | **Anti-α-Actinin** | Mouse | Sigma | A5044 | 1:100 |
| **Anti-α-SMA** | Mouse | Sigma | A5228 | 1:100 |
| **Anti-Caveolin-1** | Rabbit | Finetest | FNab01313 | 1:100 |
| **Anti-CD34** | Mouse | Abcam | ab762 | 1:100 |
| **Anti-CD34** | Mouse | BD | 550390 | 1:100 |
| **Anti-CD34** | Rabbit | Thermo | PA585917 | 1:500 |
| **Anti-CD34** | Rabbit | Abcam | ab81289 | 1:100 |
| **Anti-CD73** | Mouse | Abcam | ab54217 | 1:100 |
| **Anti-CD90** | Mouse | Abcam | ab225 | 1:100 |
| **Anti-CD105** | Mouse | Abcam | ab11414 | 1:100 |
| **Anti-c-Kit (CD117)** | Rabbit | Finetest | FNab01726 | 1:100 |
| **Anti-PDGFR-α** | Rabbit | Abcam | ab203491 | 1:100 |
| **Anti-Vimentin** | Mouse | Finetest | FNab09410 | 1:100 |
| **Anti-Vimentin** | Mouse | Sigma | V6630 | 1:100 |
| **Secondary Antibodies** | **FITC GaM** | Goat | Calbiochem | 401244 | 1:100 |
| **Cy3 GaRb** | Goat | Jackson Imm. | 11-165-045 | 1:100 |
| **Dyes** | **FITC Phalloidin** | *A. phalloides* | Sigma | P5282 | 1:10 |
| **633 Phalloidin** | *A. phalloides* | Invitrogen | A22284 | 1:100 |
| **Hoechst 33258** | - | Mol. Probes | 33258 | 1:1000 |
