# Supplementary material for: Identification and Localization of Telocyte-Like Cells in Human Umbilical Cord Stroma
Source: Research Square preprint supplement (doi:10.21203/rs.3.rs-7203915/v1), 2025-08-22
Supplement: Supplementary file 2 [file 8ffbc51aef1732b4bc57ed83.docx]

| 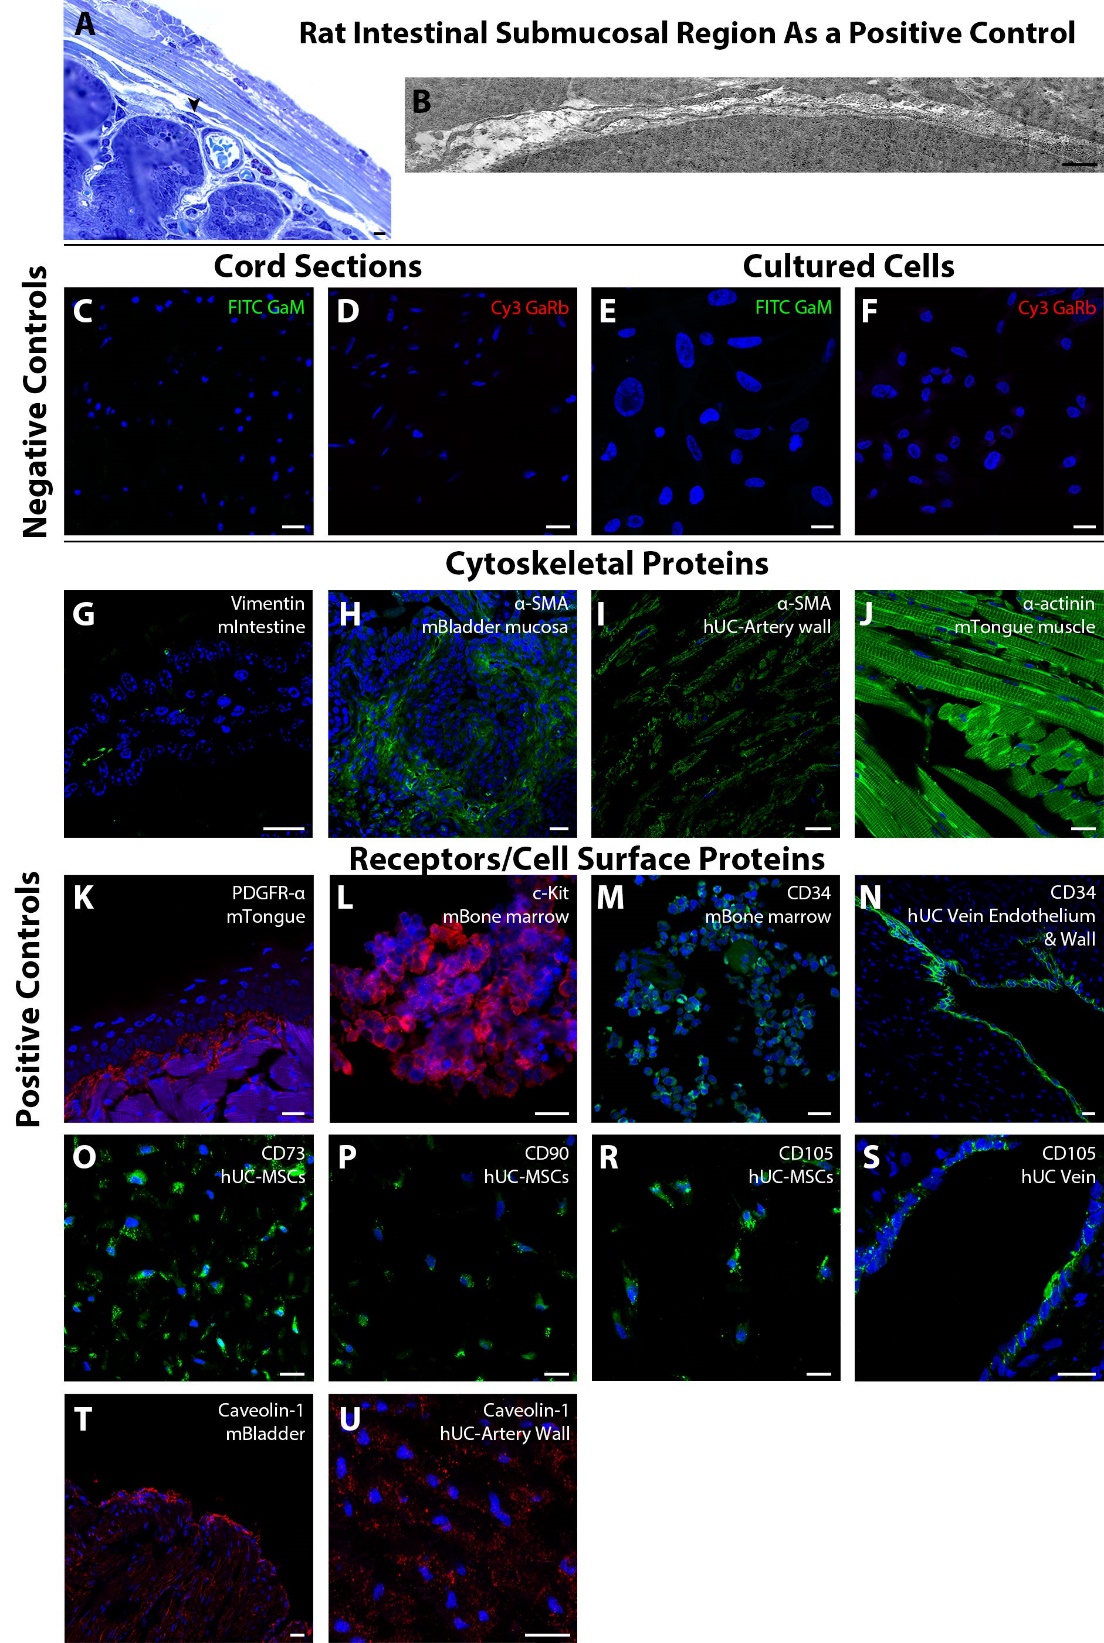 |
| --- |
| **Supplementary Fig. 1.**  (**A** and **B**) Rat intestinal submucosa for verifying the existence and phenotype of telocytes. (**C–F**) Antibody omission results (negative controls) for secondary antibodies used. (**G–U**). Various tissue sections used for positive controls. **m**: Mouse; **h**: Human. Scale bars: 10 µm (A); 1 µm (B); 20 µm (C–U). |
