# Supplementary material for: Identification and Localization of Telocyte-Like Cells in Human Umbilical Cord Stroma
Source: Research Square preprint supplement (doi:10.21203/rs.3.rs-7203915/v1), 2025-08-22
Supplement: Supplementary file 3 [file 97bbf6050888e4165bf7ff48.docx]

**Supplementary Table** **3**: Calculated 2(−ΔCt) values for the eight target genes in three biological replicates of the qRT-PCR experiments.

| Sample # | Vimentin | CD73 | PDGFR-α | Caveolin-1 | c-Kit | CD34 | CD90 | CD105 |
| --- | --- | --- | --- | --- | --- | --- | --- | --- |
| Total UC Sample-1 | 1.1858 | 0.00352 | 0.04489 | 0.00195 | 0.03446 | 0.00021 | 0.00494 | 0.00194 |
| Total UC Sample-2 | 1.4438 | 0.00294 | 0.05115 | 0.00296 | 0.06093 | 0.00038 | 0.00208 | 0.00192 |
| Total UC Sample-3 | 1.30003 | 0.00301 | 0.03417 | 0.00128 | 0.03125 | 0.00015 | 0.0058 | 0.00105 |
| Mean | 1.30988 | 0.00316 | 0.04340 | 0.00206 | 0.04221 | 0.00025 | 0.00427 | 0.00164 |
| Standart Deviation | 0.12928 | 0.00032 | 0.00859 | 0.00085 | 0.01629 | 0.00012 | 0.00195 | 0.00051 |
