# Supplementary material for: Identification and Localization of Telocyte-Like Cells in Human Umbilical Cord Stroma
Source: Research Square preprint supplement (doi:10.21203/rs.3.rs-7203915/v1), 2025-08-22
Supplement: Supplementary file 4 [file dfde66b4fb4fb72008664c63.docx]

| 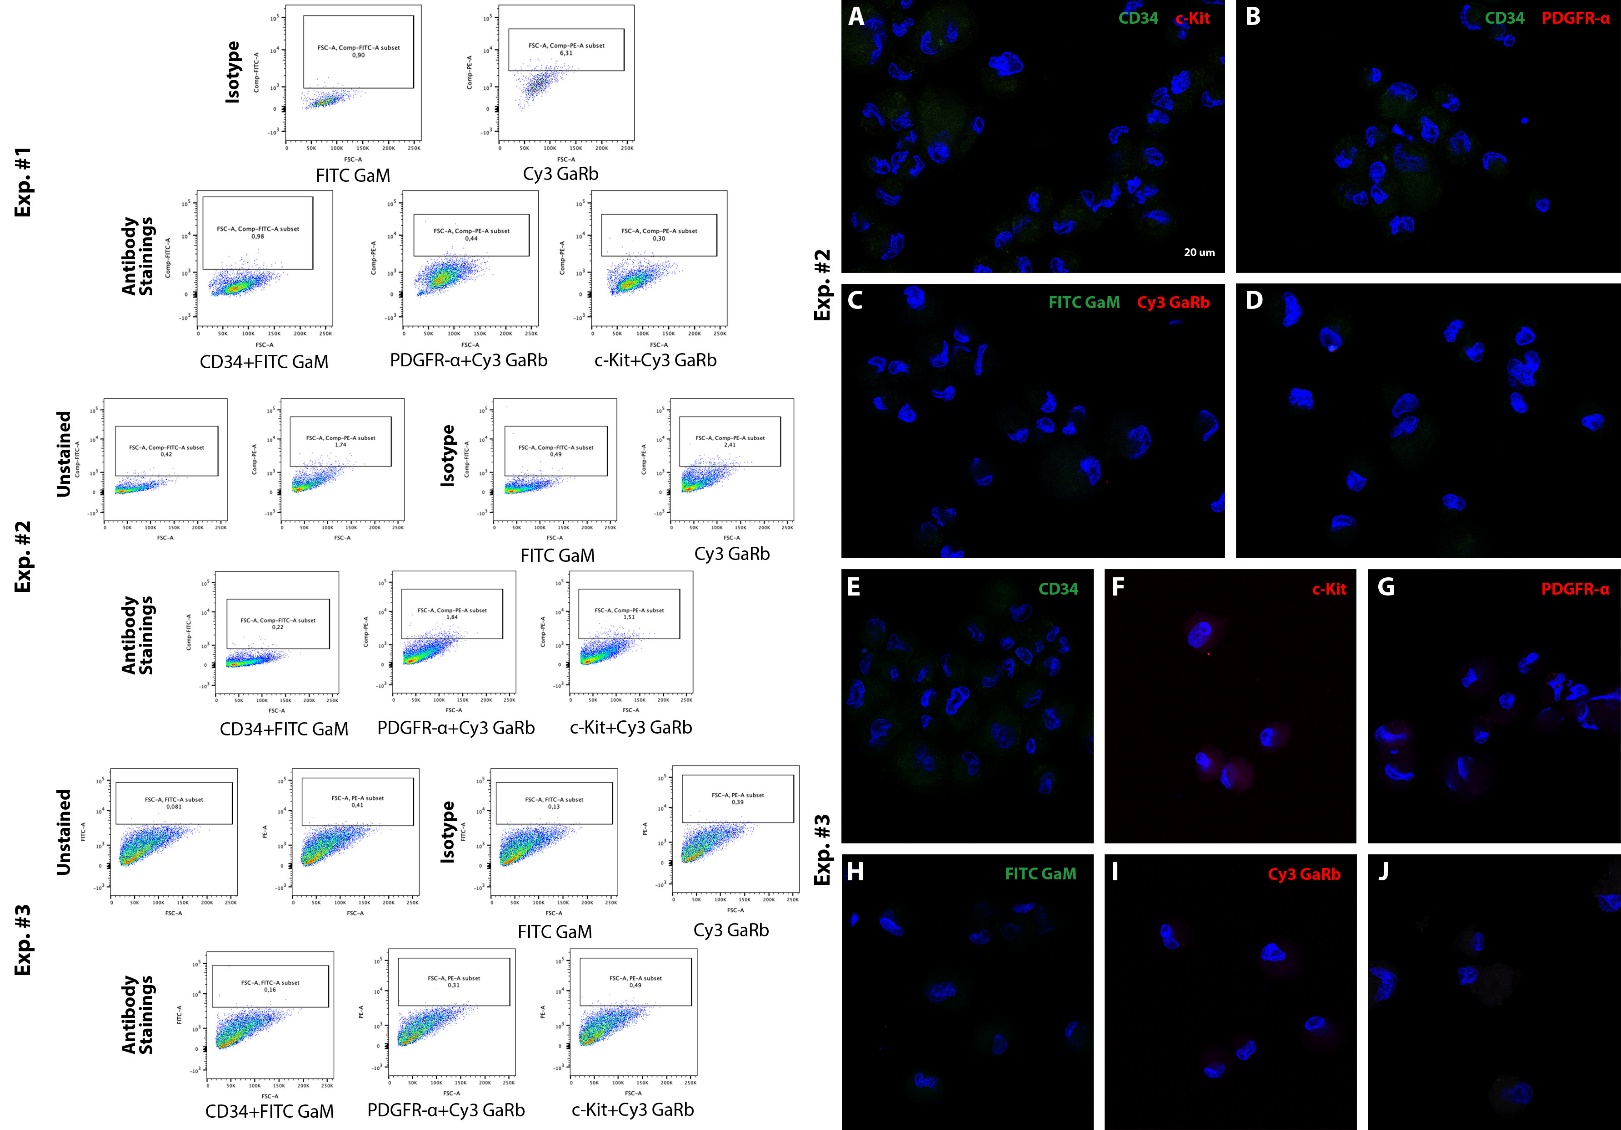 |
| --- |
| **Supplementary Fig. 2.**  Flow cytometry and SR-CM analysis of UC stromal cell populations using known telocyte markers. Flow cytometry did not reveal any distinct cell populations based on known telocyte markers (i.e., CD34, PDGFR-α, and c-Kit) in isolated, cultured, live UC stromal cells. Three sets of experiments were conducted using single and double marker combinations, with variations in antibody concentration and incubation time. (**A–J**) To verify the negative results, the same cell populations were examined using SR-CM. No specific fluorescence signal was detected in either single- or double-labeled specimens. Scale bars: 20 µm. |
