# Supplementary material for: Identification and Localization of Telocyte-Like Cells in Human Umbilical Cord Stroma
Source: Research Square preprint supplement (doi:10.21203/rs.3.rs-7203915/v1), 2025-08-22
Supplement: Supplementary file 5 [file ff6a899b6cae766ca49c97ee.docx]

**Supplementary Table** **2**: Genes and primer sequences used in qRT-PCR analysis.

| No | Gene | Primer Sequences 5’→ 3’ | | Melting Temperature  (°C) | Primer Length  (bp) |
| --- | --- | --- | --- | --- | --- |
| 1 | **CD90**  **NM_001311160.2** | F | TTCTCTCCTCCAGGAACACGAT | 60,56 | 22 |
| R | CTGGTCACCTTCTGCCCTC | 59,70 | 19 |
| 2 | **CD34**  **NM_001025109.2** | F | AGTGTCTACTGCTGGTCTTGG | 59,38 | 21 |
| R | TCCACCGTTTTCCGTGTAATAAG | 59,00 | 23 |
| 3 | **CD105**  **NM_000118.4** | F | CGGGTCTCAAGACCAGGAAG | 59,75 | 20 |
| R | TCAATCCCTCAGAGGCTTCAC | 59,44 | 21 |
| 4 | **CD73**  **NM_001204813.2** | F | TGGCTCCTCTCAATCATGCC | 59,82 | 20 |
| R | TGGATTCCATTGTTGCGTTCA | 58,77 | 21 |
| 5 | **PDGFR-α NM_001347828.2** | F | AAGAGATCATTGGAGGCCGTG | 60,13 | 21 |
| R | ACAGCCTAAGACCAGGAACG | 59,39 | 20 |
| 6 | **Vimentin**  **NM_003380.5** | F | GGACCAGCTAACCAACGACA | 59,97 | 20 |
| R | AAGGTCAAGACGTGCCAGAG | 59,97 | 20 |
| 8 | **CD117 (c-Kit) NM_001093772.2** | F | AACCAAGGCCGACAAAAGGA | 60,11 | 20 |
| R | ACAGGTAGTCGAGCGTTTCC | 59,76 | 20 |
| 9 | **Caveolin-1 NM_001172895.1** | F | TTCCAACACGTAGCTGCCCT | 61,76 | 20 |
| R | AACTGTGTGTCCCTTCTGGT | 58,79 | 20 |
| 10 | **GAPDH**  **NM_001289745.3** | F | TGCACCACCAACTGCTTAG | 57,98 | 19 |
| R | GATGCAGGGATGATGTTC | 52,81 | 18 |
